# Supplementary material for: Improving the spatial resolution of air-quality modelling at a European scale – development and evaluation of the Air Quality Re-gridder Model (AQR v1.1)
Source: Copernicus journal article supplement (doi:10.5194/gmd-9-4475-2016), 2016-12-16
Supplement: Supplementary file 1 [file gmd-9-4475-2016-supplement.zip]

Archive with 4 entries (4 files):
- Model_Code_plus_example_files.zip
- gmd-9-4475-2016-supplement-title-page.pdf
- MarkTheobald_et_al_AQRModel_v1_1_SupplementaryMaterial.pdf
- MarkTheobald_et_al_AQRModel_v1_1_Plot_data_Fig4_Fig5_Fig6.xlsx
