# Supplementary material for: Improving the spatial resolution of air-quality modelling at a European scale – development and evaluation of the Air Quality Re-gridder Model (AQR v1.1)
Source: Copernicus journal article supplement (doi:10.5194/gmd-9-4475-2016), 2016-12-16
Supplement: Supplementary file 1 [file gmd-9-4475-2016-supplement.zip › gmd-9-4475-2016-supplement-title-page.pdf]

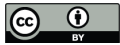

## *Supplement of*

# **Improving the spatial resolution of air-quality modelling at a European scale – development and evaluation of the Air Quality Re-gridder Model (AQR v1.1)**

**Mark R. Theobald et al.**

*Correspondence to:* Mark R. Theobald ([mark.theobald@ciemat.es](mailto:mark.theobald@ciemat.es))

- [gmd-9-4475-2016-supplement-title-page.pdf](#)
- [MarkTheobald\\_et\\_al\\_AQRModel\\_v1\\_1\\_Plot\\_data\\_Fig4\\_Fig5\\_Fig6.xlsx](#)
- [MarkTheobald\\_et\\_al\\_AQRModel\\_v1\\_1\\_SupplementaryMaterial.pdf](#)
- [Model\\_Code\\_plus\\_example\\_files.zip](#)

The copyright of individual parts of the supplement might differ from the CC-BY 3.0 licence.
