# Supplementary material for: Improving the spatial resolution of air-quality modelling at a European scale – development and evaluation of the Air Quality Re-gridder Model (AQR v1.1)
Source: Copernicus journal article supplement (doi:10.5194/gmd-9-4475-2016), 2016-12-16
Supplement: Supplementary file 1 [file gmd-9-4475-2016-supplement.zip › MarkTheobald_et_al_AQRModel_v1_1_Plot_data_Fig4_Fig5_Fig6.xlsx]

## Sheet: NO2
Domain	Station Type	Measured Conc.	EMEP	Sub-grid model	Sub-grid model (emission heights/2)	Sub-grid model (emission heights × 2)	Sub-grid model (domain specific meteorology)	Sub-grid model (synthetic meteorology)	Sub-grid model (7 × 7 km2 emissions)	Sub-grid model (using emissions only)
	[Traffic/Non-traffic]	[ug/m3]	[ug/m3]	[ug/m3]	[ug/m3]	[ug/m3]	[ug/m3]	[ug/m3]	[ug/m3]	[ug/m3]
Netherlands	NT	19.0244	23.0219	17.6309	19.9925	19.221	17.8995	19.535	23.2737	4.57525
Netherlands	NT	17.7447	21.2494	19.9399	18.995	18.9774	19.426	18.9875	17.1817	19.6334
Netherlands	NT	25.8198	21.2494	17.1729	18.1679	18.0017	17.887	18.0608	21.9117	5.11974
Netherlands	NT	17.3667	20.6868	18.4923	20.6362	20.5229	19.4589	20.569	28.3516	4.50758
Netherlands	T	43.4446	20.6868	36.3955	38.4328	39.2991	38.8096	38.9869	28.0526	76.7518
Netherlands	NT	28.4022	20.6868	34.5853	33.3033	33.9479	35.3555	33.7147	28.2104	54.0354
Netherlands	NT	29.0117	22.0811	32.0957	31.9031	32.1531	31.9635	32.0647	31.0156	71.8242
Netherlands	NT	21.3966	24.3705	20.2641	22.339	22.5141	21.2843	22.457	25.0911	21.8801
Netherlands	NT	20.0423	20.9126	19.2796	20.187	20.2647	19.5654	20.2381	18.4575	39.0954
Netherlands	NT	20.2325	22.0811	17.5211	19.9131	19.9256	18.8363	19.9249	25.1987	5.82268
Netherlands	T	40.8264	24.3705	36.4739	36.3667	36.0037	35.6123	36.1445	29.8876	41.8353
Netherlands	NT	23.7072	20.036	20.5522	21.1551	21.119	21.1744	21.1439	21.1114	29.3839
Netherlands	NT	35.6966	27.6428	44.6042	40.5251	41.0025	42.3522	40.847	29.568	54.9031
Netherlands	NT	31.295	24.3705	57.1503	53.9857	54.84	59.707	54.5407	34.1071	118.156
Netherlands	T	45.9906	20.9126	42.649	42.0218	42.6934	42.7583	42.4451	39.025	88.8979
Netherlands	T	51.9028	24.3705	52.1595	50.7915	51.418	52.9669	51.2124	34.8969	102.182
Netherlands	NT	39.6158	24.3705	48.141	47.8533	48.4194	49.6844	48.2295	35.2793	78.7835
Netherlands	T	34.5262	20.9126	38.0789	36.9334	37.412	38.668	37.2336	37.7105	69.49
Netherlands	NT	28.2302	27.6428	47.675	42.0917	42.5009	45.2506	42.3592	39.4942	65.6046
Netherlands	T	33.8403	23.0816	30.5129	26.3265	26.3445	30.6581	26.3385	25.2278	24.4368
Netherlands	NT	20.9281	25.6127	13.9058	13.359	13.174	13.1079	13.2392	14.3584	4.2929
Netherlands	NT	23.578	21.8677	13.2998	12.9729	12.8407	12.5932	12.8843	13.2532	3.96286
Netherlands	NT	17.0083	23.0816	19.6657	19.7103	19.5998	20.6605	19.6382	22.6321	7.57846
Netherlands	NT	20.3571	25.6127	13.2244	13.7779	13.5903	13.2495	13.6562	14.4444	1.87552
Netherlands	T	43.0944	25.6127	37.0928	36.5716	36.5805	37.686	36.5835	35.2421	37.4035
Netherlands	T	36.9721	25.6127	35.0904	33.6669	33.5816	35.3764	33.6017	34.7531	41.1141
Netherlands	T	40.0949	25.6127	28.386	29.2493	29.3381	30.4962	29.3088	21.9374	40.5239
Netherlands	T	41.1248	23.0816	40.8044	36.9898	37.2042	38.6788	37.1235	33.6841	39.9921
Netherlands	NT	28.1365	23.1926	43.2284	46.9383	46.8664	47.0208	46.864	39.1565	72.2916
Netherlands	T	44.5943	23.1926	52.9247	56.5536	56.6593	59.5646	56.5986	38.8656	90.9547
Netherlands	T	43.2405	25.6127	68.9229	64.5745	65.1357	67.191	64.9371	48.3808	130.547
Netherlands	NT	31.9682	25.6127	48.2011	47.8582	48.1335	49.912	48.0361	43.0931	68.2254
Netherlands	NT	18.3458	23.1926	13.8122	13.9244	13.8689	13.3526	13.89	14.7349	8.98205
Netherlands	NT	19.9139	16.0776	14.1078	14.3292	14.3168	13.8977	14.3231	17.0694	6.50256
Netherlands	NT	14.4299	13.5707	16.4945	16.1796	16.1928	17.1045	16.1897	14.0166	23.6634
Netherlands	NT	17.0504	16.968	13.9346	14.1574	14.2426	13.9831	14.2055	12.7951	6.11333
Netherlands	NT	14.8972	14.4139	10.9402	11.7875	11.7616	10.9512	11.7716	13.1014	2.81867
Netherlands	NT	15.8646	12.5135	12.3233	11.8298	11.8141	11.8682	11.82	14.0491	3.7683
Netherlands	NT	11.5886	12.5135	10.4215	10.6697	10.6869	10.5037	10.6805	8.87182	8.6896
Netherlands	NT	11.6681	12.4415	9.80881	10.2053	10.2231	10.0428	10.2225	10.1435	9.48805
Netherlands	NT	14.3286	11.4155	6.96805	7.45717	7.41262	7.10509	7.42768	8.35875	6.65473
Netherlands	T	38.729	11.4155	51.6675	45.4037	46.291	54.3569	45.9783	31.7539	93.4248
Netherlands	NT	13.8719	11.4155	22.5414	18.0475	18.2378	22.5286	18.1691	17.379	8.16206
Central Scotland	T	25	4.06878	10.9287	13.9472	14.0878	11.1431	14.0398	9.66773	22.5755
Central Scotland	NT	25	4.06878	35.2312	33.9444	34.6981	36.9612	34.4187	15.3392	106.454
Central Scotland	T	73	4.06878	36.7325	37.2466	37.8195	37.5492	37.6112	15.1364	130.925
Central Scotland	T	55	4.06878	22.9414	25.023	25.3304	22.9887	25.2214	14.887	54.4469
Central Scotland	NT	8	7.68001	8.414	9.56568	9.68921	9.05885	9.64073	8.54605	11.0992
Central Scotland	T	53	6.43089	16.2613	18.6082	19.2245	15.17	18.9954	13.3004	58.6136
Central Scotland	T	52	6.43089	18.1772	20.1267	20.9174	18.2732	20.6244	13.9263	72.9689
Central Scotland	T	43	6.43089	18.1772	20.1267	20.9174	18.2732	20.6244	13.9263	72.9689
Central Scotland	T	47	6.43089	18.1772	20.1267	20.9174	18.2732	20.6244	13.9263	72.9689
Central Scotland	T	41	7.75803	14.0047	13.8292	14.2968	14.7942	14.1283	15.2302	27.1462
Central Scotland	T	33	5.45871	17.2029	16.4022	17.188	18.4121	16.9036	13.2352	38.9446
Central Scotland	T	37	5.45871	10.3748	10.2449	10.8174	10.8553	10.6058	10.8634	17.2628
Central Scotland	T	42	7.68001	22.2113	21.4799	22.6814	24.7082	22.2327	18.5513	40.9866
Central Scotland	T	41	7.68001	26.8206	27.1059	28.7378	28.5047	28.1349	19.5205	69.3573
Central Scotland	T	32	7.68001	37.0019	36.9635	39.443	38.1363	38.5445	20.1228	122.082
Central Scotland	T	28	7.68001	22.2113	21.4799	22.6814	24.7082	22.2327	18.5513	40.9866
Central Scotland	T	75	7.68001	24.7087	22.9051	24.2334	24.3717	23.7399	19.496	49.3467
Central Scotland	NT	31	7.68001	24.161	23.5282	24.8413	25.6493	24.3684	19.6736	40.0178
Central Scotland	NT	5	3.37469	2.5854	2.25901	2.28351	2.58642	2.27433	2.01369	1.32567
Central Scotland	NT	25	5.45871	13.5133	13.5505	13.4297	11.8894	13.4878	8.63721	24.2547
Central Scotland	T	24	5.45871	11.042	11.4381	11.9248	9.68214	11.7847	7.91328	23.9406
Central Scotland	T	31	5.45871	11.042	11.4381	11.9248	9.68214	11.7847	7.91328	23.9406
Central Scotland	T	46	6.43089	7.06435	7.54868	7.58408	7.27322	7.56848	5.6313	16.9976
Central Scotland	T	30	7.68001	8.69814	9.66191	10.125	7.78095	9.96527	8.14758	17.5662
Central Scotland	T	26	7.68001	7.13962	8.3543	8.60946	6.87363	8.51942	10.3115	3.26886
Central Scotland	NT	11	1.3799	5.00939	5.56338	5.54747	6.00968	5.55292	4.49623	15.1378
Central Scotland	NT	32	7.75803	30.3713	30.4754	31.8532	29.7819	31.3597	21.0961	93.2786
Central Scotland	T	32	7.75803	16.3996	16.8455	17.3391	16.4909	17.1636	20.459	22.8828
Central Scotland	T	43	7.75803	22.639	22.5907	23.6608	21.8885	23.2771	18.1351	58.7888
Central Scotland	T	35	7.75803	37.0596	36.8243	38.571	37.4561	37.9436	20.563	133.576
Central Scotland	T	48	7.75803	37.0596	36.8243	38.571	37.4561	37.9436	20.563	133.576
Central Scotland	T	82	7.75803	28.4085	29.3574	30.6691	27.8695	30.1978	21.0555	84.2679
Central Scotland	NT	12	7.75803	9.29409	10.3875	10.3661	8.64047	10.3758	12.7428	5.84408
Central Scotland	NT	17	5.45871	11.9425	12.703	12.0425	10.9838	12.1794	8.43788	18.6716
Central Scotland	T	21	1.93337	7.5595	8.66481	8.71013	8.09539	8.69463	7.75635	20.7602
Central Scotland	T	36	5.45871	13.3821	12.0267	12.5229	13.1038	12.3389	10.4318	15.8024
Central Scotland	T	31	5.45871	16.9155	15.6971	16.4537	15.9021	16.1768	15.0393	23.1649
Central Scotland	NT	24	5.45871	18.1771	17.4574	18.3391	17.9312	18.0165	14.7517	33.3034
Central Scotland	T	25	5.45871	9.03264	8.71588	9.22004	8.71654	9.03322	7.34838	12.947
Central Scotland	T	22	7.68001	9.00083	8.34845	8.59144	8.30839	8.49928	5.85805	15.2426
Central Scotland	T	87	7.75803	18.7053	20.0463	20.5411	19.2956	20.3622	19.8153	33.6912
Central Scotland	NT	25	7.75803	38.4213	37.9206	39.4872	41.5957	38.9276	18.117	166.677
Central Scotland	T	60	2.79747	12.4702	12.4248	13.6487	13.4966	13.2005	6.53365	44.345
Central Scotland	T	27	2.79747	12.4702	12.4248	13.6487	13.4966	13.2005	6.53365	44.345
Central Scotland	T	37	7.75803	17.8832	17.3588	17.7047	16.7044	17.5786	12.7841	34.1211
Central Scotland	T	24	7.75803	14.9798	15.4752	15.9696	16.9678	15.7913	11.9174	47.4046
Central Scotland	T	19	7.75803	9.19035	9.27397	9.38546	8.94589	9.34655	6.81886	9.81313
Central Scotland	T	20	7.68001	7.81921	8.2145	8.19714	6.86361	8.23572	6.65671	10.3826

## Sheet: NH3
Domain	Network	Measured Conc.	EMEP	Sub-grid model	Sub-grid model (domain specific meteorology)	Sub-grid model (synthetic meteorology)	Sub-grid model (7 × 7 km2 emissions)	Sub-grid model (using emissions only)
		[ug/m3]	[ug/m3]	[ug/m3]	[ug/m3]	[ug/m3]	[ug/m3]	[ug/m3]
Scotland	Local	0.770998	1.17407	2.30898	2.32991	2.29835	1.24938	3.76332
Scotland	Local	1.7195	1.17407	2.42321	2.4519	2.46253	1.26232	4.09997
Scotland	Local	0.71037	1.17407	2.59721	2.66233	2.64985	1.20417	5.37064
Scotland	Local	3.28135	1.17407	2.88336	3.03457	2.89254	1.19247	6.06409
Scotland	Local	0.390562	1.17407	1.77552	1.81629	1.71743	1.19975	2.51436
Scotland	Local	3.07049	1.17407	2.75847	2.87289	2.74403	1.17476	6.02534
Scotland	Local	2.61078	1.17407	2.95657	3.281	2.7589	1.11433	6.08317
Scotland	Local	0.393158	1.17407	1.3577	1.39972	1.32205	1.18895	0.498768
Scotland	Local	0.543929	1.17407	2.19422	2.27098	2.15848	1.17254	4.36766
Scotland	Local	2.02742	1.17407	2.60301	2.75383	2.54132	1.15679	5.85219
Scotland	Local	8.86118	1.17407	2.92678	3.14252	2.75539	1.14116	6.10106
Scotland	Local	3.38035	1.17407	3.03657	3.36385	2.80166	1.11457	6.13356
Scotland	Local	1.09716	1.17407	1.1859	1.21213	1.20705	1.18168	0.498726
Scotland	Local	0.713778	1.17407	2.04331	2.22051	1.87218	1.14567	2.50614
Scotland	Local	4.4245	1.17407	2.743	3.01623	2.5391	1.12269	5.80373
Scotland	Local	2.1436	1.17407	1.73651	1.97839	1.53869	1.12657	0.858357
Scotland	Local	5.66268	1.17407	2.21808	2.51377	1.95736	1.11628	3.36104
Scotland	Local	0.615742	1.17407	1.1118	1.15644	1.13492	1.16689	0.594631
Scotland	Local	1.12839	1.17407	1.26108	1.4041	1.24158	1.13403	0.592312
Scotland	Local	1.1741	1.17407	1.36196	1.56777	1.30526	1.12307	0.652781
Scotland	Local	1.89659	1.17407	1.2426	1.42273	1.21089	1.12468	0.64064
Scotland	National	0.459167	0.606112	0.489492	0.520484	0.437375	0.356088	0.236744
Scotland	National	0.102143	0.190176	0.214419	0.229643	0.21962	0.213032	0.190594
Scotland	National	0.737692	1.17407	2.04331	2.22051	1.87218	1.14567	2.50614
Scotland	National	1.01643	1.17407	1.01242	1.0156	1.03999	1.13811	0.582423
Scotland	National	0.517857	1.17407	1.01747	1.0077	1.0495	1.10383	0.548118
Scotland	National	1.21714	1.17407	1.3361	1.30856	1.31535	0.627906	2.25739
Scotland	National	0.0807143	0.172703	0.174786	0.173901	0.174451	0.180003	0.166243
Scotland	National	0.0907143	0.172703	0.204915	0.195652	0.202091	0.192522	0.232705
Scotland	National	0.473846	0.273531	0.234308	0.21986	0.225018	0.2091	0.299195
Scotland	National	0.354	0.128528	0.167817	0.189265	0.163328	0.126776	0.302717
Scotland	National	0.107857	0.128528	0.134202	0.142094	0.138365	0.1355	0.12725
Scotland	National	0.107692	0.104907	0.109262	0.0838975	0.104109	0.112827	0.037753
Scotland	National	0.0653846	0.104907	0.108906	0.121473	0.108696	0.0999489	0.146044
Scotland	National	1.22357	0.423272	1.02724	1.06589	1.09017	1.37618	1.9333
Holland	National	2.7	3.84123	3.00333	2.92175	2.99035	5.0584	0.0433651
Holland	National	4	3.84123	3.00448	2.92433	3.0559	4.93538	0.202783
Holland	National	2.8	3.84123	2.99711	2.88288	3.11734	4.88236	0.0248168
Holland	National	1.9	3.3394	2.20387	2.2175	2.20513	2.40362	0.240688
Holland	National	2.2	1.14624	2.70384	2.70114	2.78715	2.88847	5.87225
Holland	National	2.1	3.3394	1.9719	1.98053	2.05688	2.18094	0.190241
Holland	National	1.9	1.14624	2.84264	2.76095	2.94276	2.74611	8.05076
Holland	National	2.7	1.14624	1.70538	1.59931	1.58724	3.05774	0.0706077
Holland	National	7.3	6.02324	5.97922	6.26935	6.22424	6.19766	2.73909
Holland	National	8	6.02324	7.21966	7.53973	7.5242	6.18355	14.1852
Holland	National	7.6	8.37272	8.9132	8.60576	8.1538	9.15065	1.19176
Holland	National	4.4	6.02324	4.60095	4.37873	4.532	6.18354	1.27247
Holland	National	4.9	8.37272	7.70932	7.52159	7.49004	9.15197	0.221868
Holland	National	4	6.02324	4.4028	4.15821	4.40699	6.26599	0.0465011
Holland	National	4.9	8.37272	8.02475	8.01256	8.11386	9.2992	0.679592
Holland	National	5.1	6.02324	4.83265	4.63981	4.9188	6.96262	0.0321174
Holland	National	4.6	8.37272	8.38752	8.34875	8.54522	9.51668	3.44503
Holland	National	4.6	6.02324	4.80103	4.47121	5.03071	7.06508	0.675693
Holland	National	5.4	6.02324	5.02668	4.79261	5.32466	7.19027	1.57688
Holland	National	4.75	6.02324	5.24028	4.99312	5.51536	7.27174	0.315019
Holland	National	5.9	6.02324	5.70296	5.74781	6.03966	7.18929	2.32459
Holland	National	5.4	6.02324	5.64409	5.52296	5.40313	7.05715	0.0158994
Holland	National	5.3	6.02324	6.23915	6.33142	5.97139	7.12995	1.08124
Holland	National	6.1	6.02324	5.45372	5.33453	5.51403	7.21065	0.00381619
Holland	National	5.6	6.02324	5.57804	5.64464	5.81081	7.21322	0.388974
Holland	National	6.1	6.02324	5.51531	5.46963	5.64184	7.16261	0.609514
Holland	National	5.5	6.02324	7.01461	7.40019	7.43934	7.22884	9.38017
Holland	National	6.1	6.02324	6.25212	6.35058	6.52621	7.21009	5.34279
Holland	National	2.4	1.14624	1.71608	1.82286	1.66051	1.55011	0.0706238
Holland	National	6.5	6.02324	6.55485	6.50015	6.19293	7.51097	1.69518
Holland	National	5.3	6.02324	5.4495	5.33272	5.58752	6.71472	0.961666
Holland	National	2	1.14624	2.13966	2.15733	2.07322	1.79598	1.52296
Holland	National	2	1.14624	1.415	1.48053	1.43035	1.52256	0.0065809
Holland	National	1.8	1.14624	1.57962	1.64475	1.58755	1.63534	0.120115
Holland	National	5	6.02324	5.95949	5.93912	6.40992	6.40598	5.83408
Holland	National	6.1	6.02324	6.80529	6.92924	7.27755	6.29953	12.4155
Holland	National	5.4	6.02324	5.43484	5.55463	5.95692	6.52863	0.149075
Holland	National	4.55	6.57967	5.91403	5.66793	5.95628	7.9198	0.526611
Holland	National	2.6	1.29614	1.13274	1.16335	1.22591	1.56271	0.00861817
Holland	National	1.7	1.29614	1.21079	1.29205	1.28845	1.56465	0.0360276
Holland	National	1.4	1.29614	1.4142	1.48815	1.42819	1.73327	0.508864
Holland	National	2.3	1.29614	1.61443	1.66618	1.584	2.3658	0.838124
Holland	National	10.5	7.31118	9.09736	9.50789	9.98723	6.90568	17.5067
Holland	National	10.5	7.31118	10.1872	10.6758	10.4055	6.98704	18.5061
Holland	National	3.4	7.31118	4.36972	4.1286	4.08973	6.28923	0.915615
Holland	National	3.8	5.81705	4.17743	3.95921	3.91676	6.2922	0.402369
Holland	National	2.9	5.81705	4.01906	3.79858	3.7882	6.27818	0.0580124
Holland	National	5.8	5.81705	7.32443	7.08871	5.7249	5.72203	1.80219
Holland	National	4.4	5.81705	6.28666	5.88136	5.08612	5.48033	0.924153
Holland	National	4.7	5.81705	5.38274	4.81533	4.45412	5.75348	0.0365001
Holland	National	5	5.81705	5.49408	5.19409	4.69951	4.75509	0.275955
Holland	National	4	5.81705	5.82276	5.40439	4.80711	5.47477	1.05448
Holland	National	3.3	5.81705	4.226	3.79694	3.78671	5.69353	0.0395995
Holland	National	2	5.81705	4.02767	3.73541	3.85979	5.2319	0.163646
Holland	National	2.2	2.18057	1.48218	1.40238	1.66173	2.32334	0.163421
Holland	National	2.1	2.18057	1.4978	1.45328	1.75094	2.06233	0.230008
Holland	National	3.2	2.18057	1.90952	1.92184	2.26722	2.20903	1.89658
Holland	National	4.15	7.03916	5.65671	5.59492	5.58156	7.8935	1.60727
Holland	National	4	7.03916	6.6785	6.64708	6.05001	6.5478	0.501214
Holland	National	4.1	7.03916	6.97868	6.88939	6.86988	6.64293	6.73689
Holland	National	4.1	7.03916	5.79659	5.7855	5.74788	6.4817	1.56831
Holland	National	4.9	7.03916	6.60707	6.57422	6.53386	6.65205	3.75742
Holland	National	4.6	7.03916	7.04514	7.07052	7.15123	6.68595	7.59329
Holland	National	4.5	5.81705	3.95391	3.91147	4.37001	5.97133	0.28489
Holland	National	4.9	7.03916	7.44795	7.56635	7.3077	5.99849	6.14479
Holland	National	3.3	7.03916	5.39654	5.31185	5.30958	5.67762	1.36324
Holland	National	5.4	5.81705	8.11334	8.5025	8.02891	6.58449	10.8892
Holland	National	4.4	5.81705	5.79603	6.0951	6.15369	6.38129	6.32446
Holland	National	4	5.81705	4.44016	4.34079	4.44157	5.51128	0.0321251
Holland	National	5.5	5.81705	8.02764	8.05266	8.77785	6.50829	17.028
Holland	National	3.7	5.81705	4.5639	4.68226	4.65268	5.50783	0.0574404
Holland	National	3.35	7.03916	5.14145	4.98928	5.27107	5.25449	2.11624
Holland	National	4.5	7.03916	5.47974	5.26152	5.42389	6.21709	1.31253
Holland	National	3.9	5.81705	4.05518	3.99577	4.24539	5.3463	0.0257633
Holland	National	5.6	7.03916	5.0015	4.88208	5.08661	5.22114	1.59526
Holland	National	5	7.03916	5.77935	5.66741	5.596	6.07128	2.28809
Holland	National	4.5	7.03916	5.66902	5.41323	5.53956	6.2943	1.82936
Holland	National	4.1	4.85242	4.63891	4.59687	4.89951	5.31363	2.09927
Holland	National	3.6	4.85242	4.24406	4.08019	4.60866	5.23026	1.4629
Holland	National	5.1	6.93441	5.80952	5.51474	5.51424	6.75225	1.4587
Holland	National	5.2	6.93441	5.79036	5.4414	5.57403	7.15473	0.758917
Holland	National	2.2	1.52941	0.413785	0.365206	0.386257	0.47309	0.0018194
Holland	National	5.6	6.93441	5.15772	5.14378	5.1133	6.28232	0.586862
Holland	National	4.3	6.93441	4.86039	4.91886	5.05962	7.09895	0.708167
Holland	National	4.1	6.93441	5.11433	5.04087	5.39019	6.69029	0.550043
Holland	National	5.1	6.93441	5.66015	5.71429	5.83124	6.31253	5.29154
Holland	National	4.4	6.93441	5.70791	5.73356	5.82806	6.42559	5.12175
Holland	National	2.7	4.85242	3.97893	3.92642	3.62482	3.74169	3.2302
Holland	National	2.7	4.85242	2.94533	2.83884	2.82911	3.79099	0.151629
Holland	National	3.1	4.85242	2.88588	2.75249	2.81902	3.77236	0.0772885
Holland	National	2.5	4.85242	2.94457	2.76179	2.97371	3.87432	0.477113
Holland	National	3.7	7.81536	5.44225	5.27388	5.00309	7.51561	1.83277
Holland	National	1.7	1.04714	0.578319	0.508165	0.603899	0.610743	0.186753
Holland	National	2.2	1.04714	0.553988	0.45591	0.592453	0.6066	0.11594
Holland	National	2.4	1.04714	0.491841	0.443789	0.555903	0.581623	0.00866085
Holland	National	4.1	3.44268	3.30481	3.1019	3.18914	4.28904	0.514471
Holland	National	4	7.81536	4.75029	4.49404	4.45392	7.62819	0.0196241
Holland	National	2.1	1.04714	0.549481	0.44947	0.613932	0.643443	0.00993367
Holland	National	2.3	1.04714	0.449975	0.422668	0.534938	0.579534	0.00771593
Holland	National	3	1.04714	0.474836	0.44875	0.565033	0.616784	0.00771239
Holland	National	4.2	7.81536	4.84019	4.46292	4.5573	7.70321	0.0706239
Holland	National	3	3.44268	3.15166	3.02382	3.04305	4.27127	0.606591
Holland	National	2.9	3.44268	2.82726	2.61639	2.82551	4.89285	0.0211597
Holland	National	2.8	3.44268	3.58472	3.5483	3.81045	4.96716	2.49517
Holland	National	2.9	5.59523	3.43561	3.3428	3.45087	4.44891	1.15581
Holland	National	2.9	5.59523	3.68158	3.49655	3.75069	4.54907	2.05862
Holland	National	3.9	5.59523	3.82439	3.7678	3.79644	4.55018	1.75943
Holland	National	3.9	3.44268	3.42025	3.42992	3.52463	3.5528	1.92573
